# Supplementary material for: Organic template-free synthesis of zeolite mordenite nanocrystals through exotic seed-assisted conversion
Source: Royal Society of Chemistry journal article supplement (doi:10.1039/c6ra08211d), 2016-01-01
Supplement: c6ra08211d1.pdf [file c6ra08211d1.pdf]

## Electronic Supplementary Information

# Organic template-free synthesis of zeolite mordenite nanocrystals through exotic seed-assisted conversion

Hongxia Zhang, Hongbin Zhang,\* Peicheng Wang, Yang Zhao, Zhangping Shi,  
Yahong Zhang, Yi Tang\*

Department of Chemistry, Laboratory of Advanced Materials, Collaborative  
Innovation Center of Chemistry for Energy Materials and Shanghai Key Laboratory  
of Molecular Catalysis and Innovative Materials, Fudan University, No. 220 Handan  
Road, 200433 Shanghai, P. R. China.

\*Corresponding Author. Emails: [yitang@fudan.edu.cn](mailto:yitang@fudan.edu.cn); [zhanghongbin@fudan.edu.cn](mailto:zhanghongbin@fudan.edu.cn).

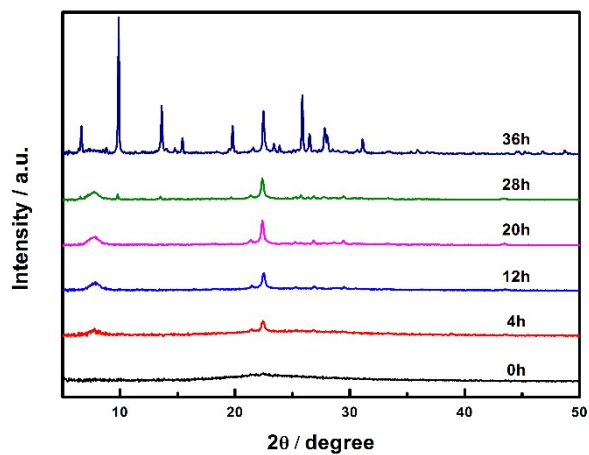

**Figure S1** XRD patterns collected at different hydrothermal treatment time for the products with 5 wt% nano-BEA seed addition.

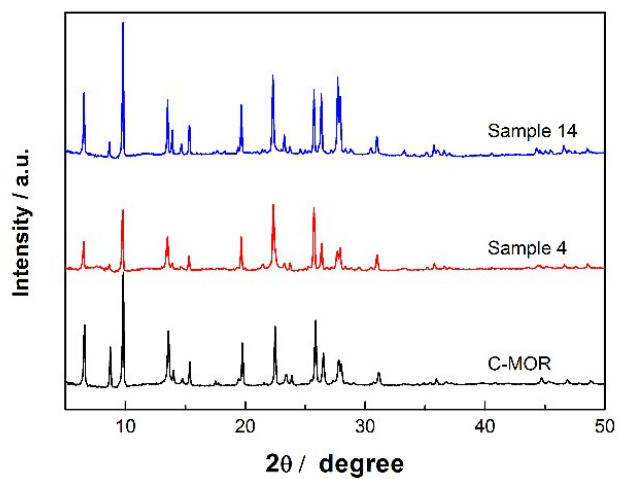

**Figure S2** XRD patterns of C-MOR, Sample 4 and Sample 14.

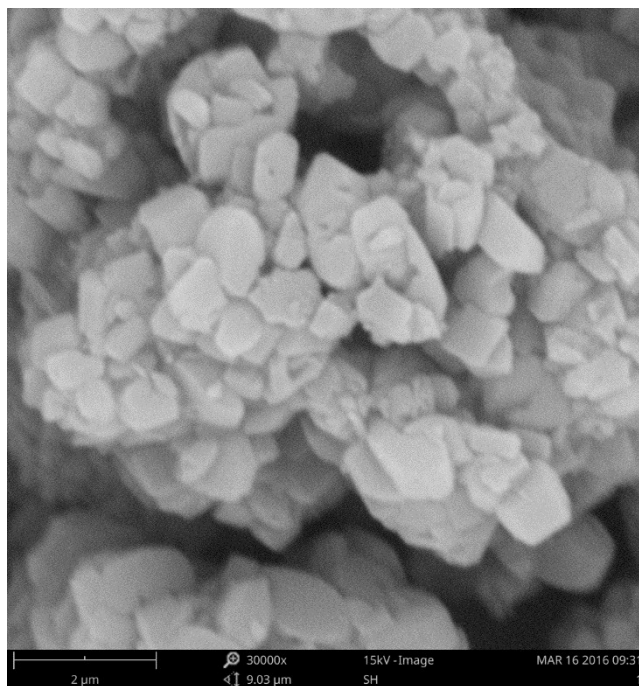

**Figure S3** SEM image of C-MOR.

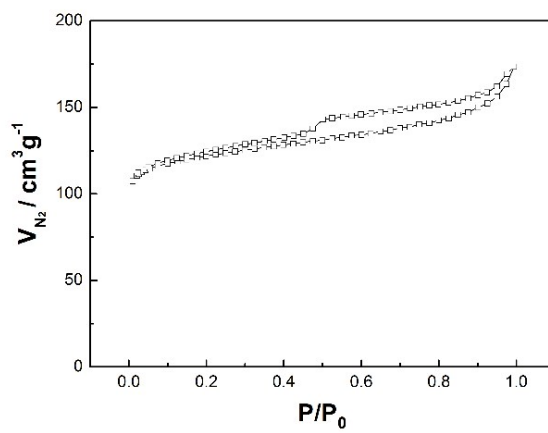

**Figure S4** Nitrogen sorption isotherm at 77 K of C-MOR.

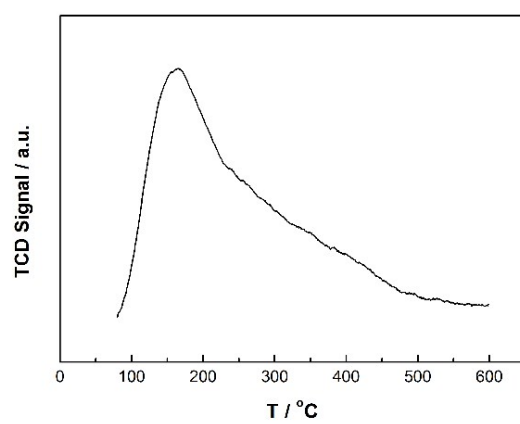

**Figure S5** NH<sub>3</sub>-TPD profile of C-MOR.
